# Supplementary material for: Simplified platform for mosaic in vivo analysis of cellular maturation in the developing heart
Source: PubMed Central journal article supplement (PMC6656758; doi:10.1038/s41598-019-47009-7), 2019-07-24
Supplement: 41598_2019_47009_MOESM2_ESM.pdf [file 41598_2019_47009_MOESM2_ESM.pdf]

**Title:** Simplified platform for mosaic *in vivo* analysis of cellular maturation in the developing heart.

**Authors:** Julie Goudy<sup>1,2</sup>, Trevor Henley<sup>1,2</sup>, Hernán G. Méndez<sup>1</sup>, & Michael Bressan<sup>1,2,\*</sup>

**Affiliations:**

<sup>1</sup>University of North Carolina at Chapel Hill, Department of Cell Biology and Physiology.

<sup>2</sup>University of North Carolina at Chapel Hill, McAllister Heart Institute.

\*Corresponding author: Michael\_Bressan@med.unc.edu

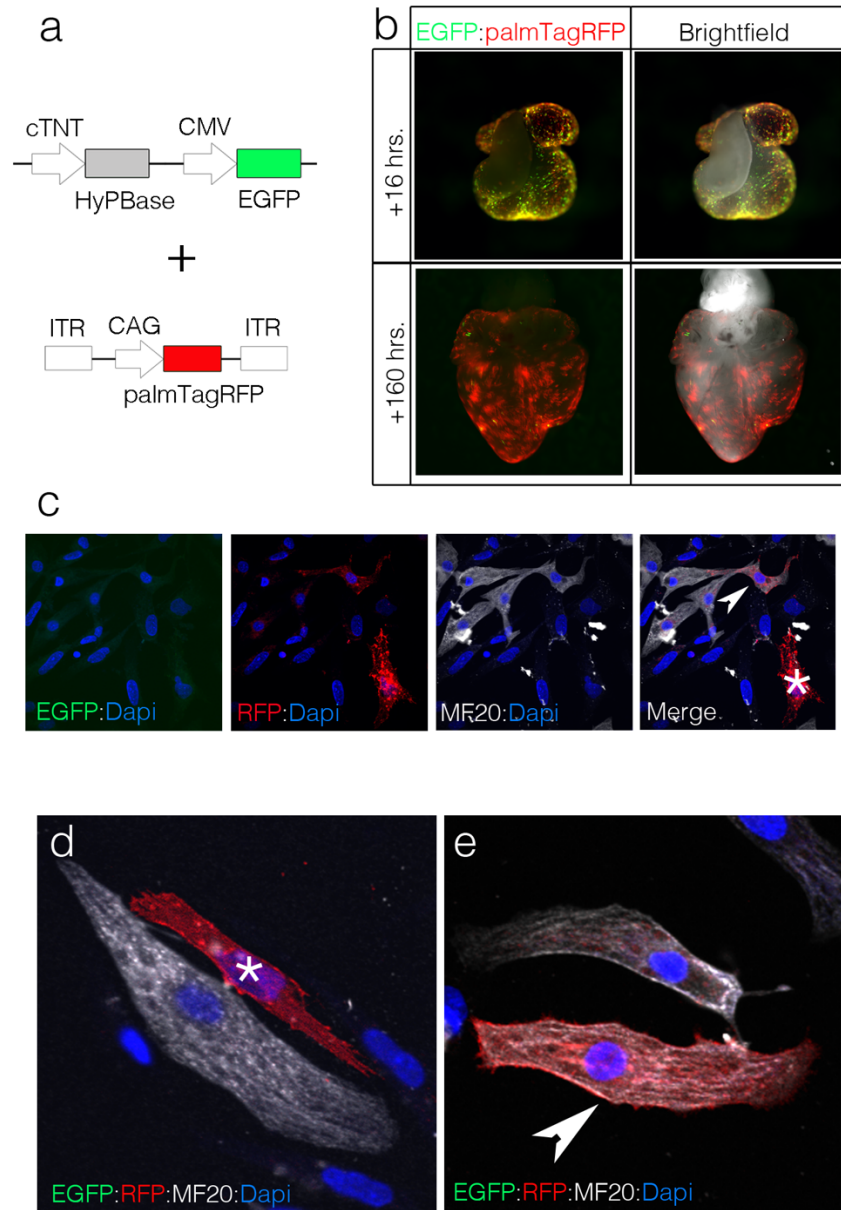

**Figure 1. Non-specific integration using the cTNT promoter. A)** Diagram of plasmid combination used for transfection. **B)** Images of example hearts 16 and 160 hrs. post transfection. Note: non-integrating cTNT-HyPBbase (CMV-EGFP) plasmid is clearly detectable after 16 hrs., but is largely absent following 160 hrs. **C)** EGFP, TagRFP, MF20, and merged images of cells dissociated from hearts transfected as described in (A). White arrowhead indicates MF20 positive/TagRFP positive myocyte, white asterisk indicates MF20 negative/TagRFP positive non-myocyte. **D)** Higher magnification image of a TagRFP positive non myocyte (white asterisks). Scalebar = 20um. **E)** Higher magnification image of a TagRFP positive/MF20 positive myocyte (white arrowhead). Scalebar = 20um.

**SMovie 1. Mosaic calcium transient analysis in the heart.** Following cotransfection with plasmids expressing palmTagRFP and GCamp6F hearts were live imaged. Movie demonstrates single channel live imaging of palmTagRFP, GCamp6F, and a merger palmTagRFP and Gcamp6f acquisitions.
